1 **Exposure–response relationships for personal exposure to fine particulate matter (PM<sub>2.5</sub>),**  
2 **carbon monoxide, and black carbon and birthweight: Results from the multi-country**  
3 **Household Air Pollution Intervention Network (HAPIN) trial**

4  
5 Kalpana Balakrishnan, PhD,<sup>1\*</sup> Kyle Steenland, PhD,<sup>2</sup> Thomas Clasen, PhD,<sup>2</sup> Howard Chang,  
6 PhD,<sup>3</sup> Michael Johnson, PhD,<sup>4</sup> Ajay Pillarisetti, PhD,<sup>5</sup> Wenlu Ye, PhD,<sup>5</sup> Luke P. Naeher, PhD,<sup>6</sup>  
7 Anaite Diaz-Artiga, PhD,<sup>7</sup> John P. McCracken, PhD,<sup>6</sup> Lisa M. Thompson, PhD,<sup>8</sup> Ghislaine Rosa,  
8 PhD,<sup>9</sup> Miles A. Kirby, PhD,<sup>10</sup> Gurusamy Thangavel, PhD,<sup>1</sup> Sankar Sambandam, PhD,<sup>1</sup>  
9 Krishnendu Mukhopadhyay, PhD,<sup>1</sup> Naveen Puttaswamy, PhD,<sup>1</sup> Vigneswari Aravindalochanan  
10 M.Sc.,<sup>1</sup> Sarada Garg, PhD,<sup>1</sup> Florian Ndagijimana,<sup>11</sup> Stella Hartinger, PhD,<sup>12,13</sup> Lindsay  
11 Underhill, PhD,<sup>12,13</sup> Katherine A Kearns, PhD,<sup>6</sup> Devan Campbell, MPH,<sup>6</sup> Jacob Kremer, BSEH,<sup>6</sup>  
12 Lance Waller, PhD,<sup>3</sup> Shirin Jabbarzadeh, MD<sup>3</sup> Jiantong Wang, MS<sup>3</sup> Yunyun Chen, MSPH<sup>3</sup>  
13 Joshua Rosenthal<sup>\*\*</sup>, PhD,<sup>14</sup> Ashlinn Quinn, PhD,<sup>3</sup> Aris T. Papageorghiou, MD,<sup>15</sup> Usha  
14 Ramakrishnan, PhD,<sup>16</sup> Penelope P. Howards, PhD,<sup>17</sup> William Checkley, MD,<sup>12,13</sup> Jennifer L.  
15 Peel PhD,<sup>18</sup> and HAPIN Investigators

16  
17 **\*Corresponding author:** *Kalpana Balakrishnan, PhD | Department of Environmental Health*  
18 *Engineering, ICMR Center for Advanced Research on Air Quality, Climate and Health, Sri*  
19 *Ramachandra Institute for Higher Education and Research (Deemed University), Chennai,*  
20 *India | [kalpanasrmc@ehe.org.in](mailto:kalpanasrmc@ehe.org.in) | 91-44-4592-8547*

21  
22 <sup>1</sup> Department of Environmental Health Engineering, ICMR Center for Advanced Research on Air Quality,  
23 Climate and Health, Sri Ramachandra Institute for Higher Education and Research (Deemed University),  
24 Chennai, India

25 <sup>2</sup> Gangarosa Department of Environmental Health, Rollins School of Public Health, Emory University, Atlanta,  
26 Georgia, USA

27 <sup>3</sup> Department of Biostatistics and Bioinformatics, Rollins School of Public Health, Emory University, Atlanta,  
28 Georgia, USA

29 <sup>4</sup> Berkeley Air Monitoring Group, Berkeley, California, USA

30 <sup>5</sup> Division of Environmental Health Sciences, School of Public Health, University of California, Berkeley,  
31 California, USA

32 <sup>6</sup> Department of Environmental Health Sciences, University of Georgia, Athens, GA, USA

33 <sup>7</sup> Center for Health Studies, Universidad del Valle de Guatemala, Guatemala

34 <sup>8</sup> Nell Hodgson Woodruff School of Nursing, Emory University, Atlanta, GA, USA

35 <sup>9</sup> Department of Infectious and Tropical Diseases, London School of Hygiene & Tropical Medicine, London, UK

36 <sup>10</sup> Department of Global Health and Population, Harvard T.H. Chan School of Public Health, Boston,  
37 Massachusetts, USA

38 <sup>11</sup> Eagle Research Centre Limited, Kigali, Rwanda

39 <sup>12</sup> Division of Pulmonary and Critical Care, School of Medicine, Johns Hopkins University, Baltimore, Maryland,  
40 USA

41 <sup>13</sup> Center for Global Non-Communicable Disease Research and Training, Johns Hopkins University, Baltimore,  
42 Maryland, USA

43 <sup>14</sup> Division of Epidemiology and Population Studies, Fogarty International Center, National Institutes of Health,  
44 Bethesda, Maryland, USA

45 <sup>15</sup> Nuffield Department of Women's and Reproductive Health, University of Oxford, Oxford, UK

46 <sup>16</sup> Hubert Department of Global Health, Rollins School of Public Health, Emory University, Atlanta, Georgia,  
47 USA

48 <sup>17</sup> Department of Epidemiology, Rollins School of Public Health, Emory University, Atlanta, Georgia, USA

49 <sup>18</sup> Department of Environmental and Radiological Health Sciences, Colorado State University, Fort Collins,  
50 Colorado, USA

51  
52 **\*NOTE:** This preprint reports new research that has not been certified by peer review and should not be used to guide clinical practice.  
53 other components of the U.S. Government.

54 **Abstract**

55

56 **Background**

57 Household air pollution (HAP) from solid fuel use is associated with adverse birth outcomes,  
58 but data on exposure-response relationships are limited. We examined associations  
59 between HAP exposures and birthweight in rural Guatemala, India, Peru, and Rwanda  
60 during the Household Air Pollution Intervention Network (HAPIN) trial.

61

62 **Methods**

63 We recruited 3200 pregnant women between 9 and <20 weeks of gestation. Women  
64 randomized to the intervention arm received a liquified petroleum gas (LPG) stove and fuel  
65 during pregnancy, while control arm women continued using biomass. We measured 24-hr  
66 personal exposures to particulate matter (PM<sub>2.5</sub>), carbon monoxide (CO), and black carbon  
67 (BC) once pre-intervention (baseline), twice post-intervention, and birthweight within 24  
68 hours of birth. We examined the relationship between the average prenatal exposure and  
69 birthweight/weight-for-gestational age z-scores using multivariate-regression models.

70

71 **Findings**

72 Results showed an inter-quartile increase in average prenatal exposure to PM<sub>2.5</sub> (74.5  
73 µg/m<sup>3</sup>) and BC (7.3 µg/m<sup>3</sup>) was associated with a 14.8 (95% confidence interval [CI]: -28.7g, -  
74 0.8g) and 21.9g (95% CI: -37.3g, -6.1g) reduction in birthweight and reduced weight-for-  
75 gestational age z-scores of -0.03 (95% CI: -0.06, 0.00) and -0.05 (95%CI: -0.08, -0.01)  
76 standard deviations, respectively. We found no associations for birthweight or weight-for-  
77 gestational age z-scores with CO exposures.

78

79 **Interpretation**

80 Results provide support for continuing efforts to reduce HAP exposure alongside other  
81 drivers of low birthweight in low- and middle-income countries.

82

83 **Funding**

84 The study is registered with ClinicalTrials.gov (NCT02944682) and funded by the U.S.  
85 National Institutes of Health (1UM1HL134590) in collaboration with the Bill & Melinda Gates  
86 Foundation (OPP1131279).

87

88 **Keywords:** Exposure-response, household air pollution, low birthweight, HAPIN Trial

89

90

91

92

93

94

95

96

97

98

99

100

## 101 Introduction

102

103 Household air pollution (HAP) exposures from the use of solid cooking fuels such as wood,  
104 coal, charcoal, dung, and agricultural residues are a leading risk factor for ill-health in low-  
105 and middle-income countries (LMICs), accounting for an estimated 2.3 million premature  
106 deaths annually and 91.5 million disability-adjusted life years.<sup>1</sup> Systematic reviews have  
107 summarized the evidence for an association between HAP exposure and adverse health  
108 effects, including child pneumonia, chronic obstructive lung disease, lung cancer, and  
109 cataracts.<sup>2</sup> Relatively few studies or reviews have focused on adverse perinatal outcomes  
110 including low birthweight.<sup>3-6</sup>

111

112 LMICs bear a disproportionate share of low birthweight (LBW, defined as <2500 g regardless  
113 of gestational age), accounting for nearly 91% of the global burden.<sup>7</sup> The etiology of LBW is  
114 complex, and despite ongoing efforts to address known risk factors such as maternal  
115 malnutrition, malaria, and smoking,<sup>8</sup> progress has been slow towards the ambitious global  
116 nutrition target of a 30% reduction of LBW by 2025.<sup>7</sup> As nearly 3.8 billion people worldwide  
117 rely on solid fuels,<sup>9</sup> a strengthened understanding of the relationship between HAP and LBW  
118 would be extremely valuable for prioritizing efforts to decrease HAP exposures during  
119 pregnancy to improve birth outcomes.

120

121 Most previous studies that examine the association between HAP exposures and LBW have  
122 used categorical indicators of exposure based on primary fuel use, with only a handful  
123 reporting quantitative exposure-response (E-R) relationships for particulate matter with an  
124 aerodynamic diameter  $\leq 2.5$  micrometers (PM<sub>2.5</sub>)<sup>10,11</sup> or carbon monoxide (CO).<sup>12-14</sup> These  
125 E-R studies report significant associations between prenatal PM<sub>2.5</sub> and/or CO exposures and  
126 LBW, but also report many limitations: small sample sizes, an inability to measure multiple  
127 pollutants, and the use of single personal exposure measures during pregnancy and/or  
128 longitudinal kitchen area measurements as proxies of longer-term personal exposure.  
129 Recent randomized control trials (RCTs) of HAP interventions in Nepal,<sup>15</sup> Nigeria,<sup>12</sup> and  
130 Ghana<sup>16</sup> have reported null effects from intention-to-treat analyses for impacts on  
131 birthweight, but E-R analyses within these studies have been limited.<sup>13</sup> To our knowledge,  
132 no studies have examined E-R relationships between prenatal black carbon (BC) exposures  
133 and birthweight.

134

135 We present results from E-R analyses performed as part of the Household Air Pollution  
136 Intervention Network (HAPIN) RCT, an efficacy study of a free prenatal liquefied petroleum  
137 gas (LPG) stove and fuel intervention conducted across four LMICs (Guatemala, India, Peru,  
138 Rwanda) with repeated personal exposure measurements. We hypothesized that higher  
139 pregnancy period PM<sub>2.5</sub>, BC, and CO exposures would result in lower birthweight among  
140 infants born to mothers enrolled in the HAPIN trial in each of – and across – the four  
141 countries.

142

## 143 Methods

144

### 145 *Study participants and settings*

146 Participants were pregnant women enrolled in the HAPIN trial, details of which have been  
147 published previously<sup>17-19</sup> and are summarized in the trial registration (ClinicalTrials.gov

148 Identifier NCT02944682). The specific study areas in each country (Jalapa Municipality,  
149 Guatemala; Villupuram and Nagapatinam districts of Tamil Nadu, India; Department of  
150 Puno, Peru; and Eastern Province, Rwanda) were selected based on high prevalence of  
151 cooking with biomass, low background ambient PM<sub>2.5</sub> concentrations, and acceptable field  
152 feasibility as assessed during an 18-month period of planning and formative research.<sup>20,21</sup>  
153 Between March 2018 and February 2020, we recruited a total of 3200 (800 per country)  
154 non-smoking, pregnant women who were between 18 and ≤35 years of age, between 9 and  
155 ≤ 20 weeks of gestation (determined via ultrasound), and who used biomass as a primary  
156 fuel. In accordance with the trial protocol, half of the participants in each country were  
157 randomized to an intervention arm that received a liquefied petroleum gas (LPG) stove and  
158 a continuous supply of LPG fuel following enrollment and throughout their pregnancy, while  
159 the balance served as controls and continued to rely chiefly on solid biomass for cooking.

160

### 161 ***Personal exposure monitoring during pregnancy***

162 Prenatal personal exposure monitoring protocols and results have been described  
163 previously.<sup>19,22</sup> Briefly, at each study site, pregnant women participated in three 24-hr  
164 personal exposure assessments, once at baseline (between 9 and <20 weeks of gestation)  
165 and twice after randomization into the control or intervention arms (between 24-32 weeks  
166 and 32-36 weeks of gestation, respectively). During each session, women wore customized  
167 vests or aprons fitted so that instrumentation was situated close to their breathing zone.  
168 PM<sub>2.5</sub> monitoring was performed using the Enhanced Children's MicroPEM™ (ECM) (RTI  
169 International), which collects (a) gravimetric samples on pre-weighed 15mm Teflon filters  
170 (MTL, USA) utilizing a 2.5 micron impactor at a flow rate of 0.3 liters per minute and (b) real-  
171 time nephelometric data.<sup>23</sup> BC was estimated post-sampling on the ECM filters using the  
172 SootScan® Model OT-21 Optical Transmissometer (Magee Scientific, USA). CO monitoring  
173 was performed using the Lascar EL-CO-USB-300 DataLogger (Lascar Electronics, USA).  
174 Participants were instructed to always wear the vest or apron during the 24-hr  
175 measurement period, except when sleeping, bathing, or when conducting other activities  
176 during which the equipment could not be safely worn. During these times, they were  
177 instructed to keep the vest or apron nearby. Additionally, data were collected on  
178 sociodemographic and household characteristics and activity patterns that may influence  
179 exposure.

180

181 Procedures for assuring data quality, weighing filters, and estimating missing gravimetric  
182 data based on nephelometry have been described previously.<sup>22</sup> Briefly, gravimetric data  
183 quality assurance involved a combination of threshold values for flow rates, inlet pressure,  
184 and sampling duration, as well as visual inspection of damaged filters by weighing room  
185 technicians. In cases where nephelometric but not gravimetric data were available, PM<sub>2.5</sub>  
186 exposure was estimated based on nephelometric data, using an instrument-specific  
187 regression coefficient for the association between nephelometric and gravimetric data for  
188 that specific ECM instrument as described previously.<sup>22</sup> CO quality assurance protocols  
189 included calibrations with zero air and span gas and a visual inspection system similar to  
190 what was applied in the GRAPHS trial in Ghana.<sup>24</sup>

191

192 For E-R analyses, gestational exposures were defined for the intervention group as the  
193 average of the pre- and post-intervention exposures, weighted by the amount of gestational  
194 time spent in each period. The pre-intervention period exposure was estimated using the

195 baseline measurement, while the post-intervention exposure was estimated using one or  
196 both personal measurements performed after intervention. This allowed for exposure  
197 changes resulting from the introduction of the intervention to be weighted according to the  
198 length of time participants had the intervention during gestation. An unweighted average  
199 of the baseline and other available (1-2) gestational period measurements was used for  
200 controls, as they continued using biomass as the primary cooking fuel throughout gestation.  
201

### 202 ***Birthweight Outcome Measurements***

203 Following a standard protocol, birthweight was measured within 24 hours of birth by a  
204 trained field worker or nurse using a Seca 334 mobile digital baby scale.  
205 Newborns were weighed naked to the nearest 10 g and duplicate measurements were  
206 recorded on tablet-based REDCap forms. If the first two measured birthweights differed by  
207 more than 10 g, a third measurement was taken. The average of the measurements was  
208 used in the data analysis. Infants were typically assessed at health facilities where they were  
209 born. Each scale was calibrated weekly in the field offices before deployment using standard  
210 5-lb and 10-lb weights; scales not within  $\pm 2.5\%$  of the standard weight were re-calibrated. In  
211 cases in which we were unable to reach the child during the prescribed 24-hr window—due  
212 mainly to COVID restrictions or critically ill infants admitted to ICUs or referral hospitals—we  
213 used measurements provided by the facility, if available, but conducted sensitivity analyses  
214 to compare results.  
215

216 As gestational age is a potential mediator in the causal pathway between HAP exposure and  
217 birthweight, we did not adjust for it in the E-R models; had we done so, its inclusion would  
218 not allow estimation of the total effect of exposure.<sup>25</sup> However, we additionally estimated z-  
219 scores for weight adjusted by gestational age defined using INTERGROWTH tables  
220 ([intergrowth21.tghn.org](http://intergrowth21.tghn.org)) as a secondary analysis. These weight-for-gestational age z-scores  
221 were derived by subtracting off the standard INTERGROWTH sex-specific weight for a given  
222 gestational age and dividing by the INTERGROWTH standard deviation of that weight.  
223 Measurements were considered invalid if the gestational age at birth was greater than 300  
224 days or if the birth weight-for-gestational age z-score did not fall between -6 and 5.  
225

### 226 ***Exposure-Response Modeling***

227 The statistical analysis plan was agreed upon in advance and published with the trial  
228 registration prior to unblinding. Analyses were independently replicated by a second  
229 member of the study team. E-R analyses were modeled separately for each pollutant (PM<sub>2.5</sub>,  
230 BC, and CO) and birthweight/birthweight-for-gestational age z-score.  
231

232 Covariate selection for models was guided by a directed acyclic graph (DAG) (Figure S3). A  
233 minimal set of potential confounders or strong risk factors (e.g., infant sex) were identified  
234 in systematic reviews of birthweight,<sup>3,6</sup> and from previous studies of HAP and birthweight.<sup>10-  
235 12,24,26</sup> We used 10% change-in-estimate (CIE) methods as outlined in Greenland (1989)<sup>27</sup> to  
236 evaluate and determine covariates included in the model. Final models included the  
237 following covariates: mother's age (categorical: <20/20-24/25-29/30-35), nulliparity  
238 (categorical: yes/no), diet diversity (categorical: low/median/high), food insecurity  
239 (categorical: food secure/mild/moderate), baseline BMI (continuous), mother's education  
240 (categorical), child gender (categorical), baseline hemoglobin (continuous), and second-hand  
241 smoke (categorical: yes/no). We also included a variable for ten geographical randomization

242 strata (one in Rwanda, one in Guatemala, two in India, six in Peru). Eighteen and twenty-six  
243 subjects were missing BMI and hemoglobin, respectively, and we created a category of  
244 missing for these variables so that they were not excluded from the analysis.

245  
246 For both birthweight and z-scores, we first fitted linear models with different exposure  
247 metrics (i.e., linear, log linear). We then evaluated nonlinear categorical (quartile modes), as  
248 well as quadratic, 2-piece linear and restricted cubic spline model with three knots<sup>28</sup>  
249 models, and assessed model fit using Akaike's Information Criterion (AIC). The knots for the  
250 2-piece spline were chosen based on AIC (using quartile cutpoints initially and then  
251 narrowing down), while knots for restricted cubic splines were placed at the 5<sup>th</sup>, 50<sup>th</sup>, and  
252 75<sup>th</sup> percentiles of exposure. We also used thin plate smoothing splines via generalized  
253 additive models, with penalization determined by generalized cross-validation score, using R  
254 package *mgcv*. We also examined effect modification by country, as well as by infant sex, via  
255 interaction terms between our exposure metrics and these variables.

### 256 257 **Ethics/registration/funding**

258 The study protocol was reviewed and approved by institutional review boards (IRBs) or  
259 Ethics Committees at Emory University (00089799), Johns Hopkins University (00007403),  
260 Sri Ramachandra Institute of Higher Education and Research (IEC-N1/16/JUL/54/49) and the  
261 Indian Council of Medical Research – Health Ministry Screening Committee (5/8/4-  
262 30/(Env)/Indo-US/2016-NCD-I), Universidad del Valle de Guatemala (146-08-2016/11-2016)  
263 and Guatemalan Ministry of Health National Ethics Committee (11-2016), A.B. PRISMA, the  
264 London School of Hygiene and Tropical Medicine (11664-5) and the Rwandan National  
265 Ethics Committee (No-357/RNEC/2018), and Washington University in St. Louis  
266 (201611159). The study was funded by the U.S. National Institutes of Health  
267 (1UM1HL134590) in collaboration with the Bill & Melinda Gates Foundation (OPP1131279).  
268 The funding sources were not involved in study design, collection, analysis, and  
269 interpretation of data, or decisions to submit the paper for publication.

### 270 271 **Results**

#### 272 **Participant Characteristics**

273 While 3200 women were enrolled in the study, 5 enrollees were determined to be ineligible  
274 after randomization and exited the study. After accounting for miscarriages, stillbirth, and  
275 withdrawals, the 3195 pregnancies yielded 3060 live births. Of these, 3018 had valid  
276 birthweights (others had birthweights measured outside the 24-hr window or the study  
277 team was unable to obtain any birthweight measurement, see CONSORT diagram, Figure  
278 S1). Sixteen additional births were excluded on account of a gestational age >300 days;  
279 weight-for-gestational age z-scores are unavailable in the INTERGROWTH database beyond  
280 300 days of gestation. 3002 subjects were thus eligible for inclusion in E-R analyses. These  
281 were further restricted by the availability of exposure data for each of the three pollutants  
282 of interest (Table 1).

283  
284 Participant characteristics are summarized in Table 2. The average age was 27.6 years, with  
285 38% of participants reporting nulliparity. The average (SD) gestational age at enrollment was  
286 15.3 ( $\pm$  3.1) weeks. Only 33% women reported acquiring secondary or higher levels of  
287 education. India had the lowest BMI, hemoglobin, and diet diversity scores, while Peru had

288 the highest. India had the highest proportion of smokers in the household. Mobile phone  
289 ownership was uniformly high across countries.

290

### 291 ***PM<sub>2.5</sub>, BC, and CO exposures***

292 We obtained 2717, 2560, and 2772 valid 24-hr prenatal personal PM<sub>2.5</sub>, BC, and CO  
293 exposure measurements, respectively. Mean (SD) weighted exposures during pregnancy  
294 were 92.2 (83.9) µg/m<sup>3</sup> for PM<sub>2.5</sub>, 10.0 (7.4) µg/m<sup>3</sup> for BC, and 2.0 (2.9) ppm for CO (Table  
295 S6). PM<sub>2.5</sub> and BC exposures were highly correlated (Spearman's  $\rho = 0.79$ ), but correlations  
296 between exposure to PM<sub>2.5</sub> and CO (Spearman's  $\rho = 0.34$ ) as well as BC and CO (Spearman's  
297  $\rho = 0.39$ ) were relatively weak. The intervention resulted in marked reduction in exposure.  
298 Post-intervention mean personal PM<sub>2.5</sub> was 24.0 µg/m<sup>3</sup> in the intervention arm and  
299 70.7 µg/m<sup>3</sup> in the control arm. Similar reductions of exposure were seen for BC and CO.

300

301 Exposure distributions are depicted in Figure 1 and described in Supplemental Table 6.  
302 Details on exposure settings and additional sociodemographic characteristics are reported  
303 elsewhere.<sup>22</sup> Missing exposure data was largely due to equipment failure and was likely to  
304 be missing at random (MAR); for more details see Johnson et al. (2021).<sup>22</sup>

305

### 306 ***Birthweight***

307 The mean (SD) birthweight of live born infants was 2909 (471) g with mean gestational age  
308 at delivery of 39.3 (1.5) weeks; 5.3% of births were classified as preterm (163/3002) and  
309 17.7% as LBW (Figure 1). Mean (SD) birthweight was 2921 g (474.3 g) in the intervention  
310 arm and 2898 g (467.9 g) in the control arm, a difference of 19.6 g (95% CI: -10.1 g, 49.2 g).

311

### 312 ***Exposure-response analyses***

313 Results for linear and log-linear models for birthweight and for weight-for-gestational age z-  
314 score are shown in Table 3 and Table 4, respectively, for each of the three measured  
315 pollutants. Quartile models are presented in Tables S1 and S2. In linear models, an inter-  
316 quartile increase in gestational exposure for PM<sub>2.5</sub> (74.5 µg/m<sup>3</sup>) and BC (7.3 µg/m<sup>3</sup>) was  
317 associated with a change in birthweight of -14.8 g (95% CI: -28.7 g, -0.8 g] and -21.9 g (95%  
318 CI: -37.7 g, -6.1 g], respectively (Table 3). For weight-for-gestational age z-scores, the same  
319 exposure increases were associated with a decrease of 0.03 (95% CI: -0.06, 0.00) and 0.05  
320 (95%CI: -0.08, -0.01) standard deviations, respectively (Table 4). No associations were  
321 apparent between CO exposures and birthweight in the linear models or between any of the  
322 measured pollutants and LBW prevalence. Quartile analyses (Tables S1 and S2) showed that  
323 the decrease in birthweight and z-scores were not monotonic for PM<sub>2.5</sub>, while decreases  
324 were monotonic for z-scores but not birthweight for BC.

325

326 Evaluation of different models indicated that the linear fit presented above was appropriate  
327 to model the relationships between the birthweight outcomes and BC. For PM<sub>2.5</sub>, however,  
328 a quadratic (non-linear) fit was better suited to the birthweight outcome (Table S3 and  
329 Figure S2), with a positive linear coefficient (0.2325) and a negative quadratic coefficient (-  
330 0.009), indicating an initial increase in birthweight with higher PM<sub>2.5</sub> followed by a  
331 subsequent decrease at the higher exposures. Both categorical and cubic spline models  
332 supported this relationship (Figure S2). Linear models fit best for BC for both birthweight  
333 and z-scores, as well as PM<sub>2.5</sub> and z-scores. Smoothed E-R curves for PM<sub>2.5</sub>/BC and  
334 birthweight and weight-for-gestational age z-scores can be seen in Figure 2 and Figure 3.

335  
336 Trends for full term births (95% of births) were similar to trends for all births (Table S4). No  
337 statistically significant interactions (at the 0.05 level) were observed with infant sex, but  
338 female births showed a larger effect than male births for birthweight, and for z-scores  
339 (Table S5). Trends were reasonably consistent across countries for the association between  
340 PM<sub>2.5</sub> and BC with both birthweight and z-scores (Tables S7 and S8). We also ran separate  
341 models for our three exposure measurements during gestation, i.e. for baseline, mid-point,  
342 and end of gestation measurements (these corresponding roughly to early 2<sup>nd</sup> trimester,  
343 end of 2<sup>nd</sup> trimester, and end of 3<sup>rd</sup> trimester). These models, for both birthweight and z-  
344 score, showed no pattern whereby early or later exposures had stronger effects on the  
345 outcome (Table S9). Indeed all time-specific E-R coefficients were weaker than those  
346 coefficients using average exposure. This might occur because single measurements involve  
347 more measurement error than average exposure across gestation, biasing results to the  
348 null.

349

## 350 Discussion

351

352 The findings of this study suggest that reducing prenatal HAP exposure could yield modest  
353 potential benefits for birthweight that are not consistent across all pollutants. To our  
354 knowledge, ours is the first study reporting on E-R relationships between gestational BC  
355 exposures from HAP and birthweight. Notably, a 7.3 µg/m<sup>3</sup> reduction in prenatal BC  
356 exposure was associated with an increase in birthweight of about 22 g, which could have  
357 positive implications for populations with a high prevalence of low birthweight.

358

359 Only three prior studies have published quantitative E-R results for birth outcomes in  
360 relation to HAP exposure, focusing on PM<sub>2.5</sub> and/or CO. In a cohort of 239 pregnant women  
361 in Tanzania, there was a negative association between CO exposure and new-born  
362 birthweight, but results were not statistically significant.<sup>29</sup> The Tanzania study also reported  
363 a 150 g (95% CI: -300 g, 0 g) reduction in birthweight per 23.0 µg/m<sup>3</sup> increase in PM<sub>2.5</sub>. The  
364 second study, among 1285 women in the Tamil Nadu region of India, reported a 4 g (95% CI:  
365 1.08 g, 6.76 g) decrease in birthweight and a 2% increase in the prevalence of LBW (95% CI:  
366 0.05%, 4.1%) for each 10 µg/m<sup>3</sup> increase in kitchen area PM<sub>2.5</sub> measured during  
367 pregnancy.<sup>10</sup> The third study, conducted as part of the GRAPHS trial in Ghana,<sup>13</sup> observed  
368 effects of CO on birthweight, birth length, and gestational age that were modified by  
369 placental malarial status. Among infants from pregnancies without evidence of placental  
370 malaria, each 1 ppm increase in CO was associated with reduced birthweight (-53.4 g [95%  
371 CI: -84.8, -21.9 g]), birth length (-0.3 cm [95% CI: -0.6, -0.1 cm]), gestational age (-1.0 days  
372 [95% CI: -1.8, -0.2 days]), and weight-for-gestational age z-score (-0.08 [95% CI: -0.16,  
373 -0.01] standard deviations]). These associations were not observed in pregnancies with  
374 evidence of placental malaria. PM<sub>2.5</sub> measurements were, however, limited in the GRAPHS  
375 trial and no association between PM<sub>2.5</sub> exposure and birthweight was observed.

376

377 The negative associations between PM<sub>2.5</sub> exposures and birthweight in our study are  
378 consistent with previous studies, but at the lower end of reported estimates. In contrast,  
379 the lack of an association between prenatal CO exposure and birthweight was unexpected.  
380 However, this is not entirely surprising as the correlations between PM<sub>2.5</sub> and CO have not  
381 been uniform across HAP settings. A systematic review examining this relationship<sup>30</sup> found



382 inconsistent correlation with slightly stronger correlation among exclusive biomass users  
383 relative to mixed fuel users ( $R^2 = 0.29$  versus  $0.18$ ). The relatively modest correlations  
384 between either  $PM_{2.5}$  or BC and CO observed in our study may have been driven under our  
385 study conditions of exclusive biomass and LPG use.

386  
387 Trials of cookstove interventions to improve birth outcomes have had mixed outcomes: an  
388 improved biomass cookstove in a cohort of 174 infants in Guatemala was associated with  
389 89 g higher birth weight (95% CI:  $-27$  g,  $204$  g) in adjusted analysis<sup>14</sup>, and a clean-burning  
390 ethanol stove intervention in Nigeria was associated with 128 g higher birth weight (95% CI:  
391  $20$  g,  $236$  g) among 258 infants in adjusted analysis.<sup>12</sup> Meanwhile, neither an improved  
392 biomass nor an LPG stove improved birth outcomes in two linked trials covering almost  
393 3000 individuals in southern Nepal.<sup>15</sup> These trials have not reported quantitative E-R  
394 relations. In the GRAPHS trial, while there was a significant E-R relationship between CO  
395 exposures and birthweight,<sup>13</sup> neither prenatally-introduced LPG nor improved biomass  
396 cookstoves improved birthweight. The investigators in all previous trials hypothesize that  
397 this is perhaps due to lower-than-expected exposure reductions in the intervention arm.

398  
399 The HAP exposure levels associated with biomass use (such as at baseline and in the control  
400 arm) in our study are at the lower end of what has been reported in previous trials, with the  
401 possible exception of the GRAPHS trial. Based on pilot phase exposure reductions<sup>20,21</sup> and  
402 estimated supra-linear E-R relationships for HAP and birthweight,<sup>31</sup> we hypothesised that  
403 the levels observed during pilot work implied that exposure reductions would occur on the  
404 steep part of the response curve for birthweight. Given the relative paucity of studies on  
405 quantitative E-R analyses for HAP based on personal exposures, it is quite possible that the  
406 shape of the E-R curve is different than what was previously estimated. Our study  
407 contributes important information regarding this relationship based on high quality personal  
408 HAP exposure and birthweight measurements from four diverse settings that can inform  
409 future development of pooled E-R coefficients spanning the range of experienced HAP  
410 exposures and may inform future E-R curves that integrate across air pollution sources.

411  
412 Finally, we note that other unmeasured factors including placental malaria, water and  
413 sanitation, and nutritional deficiencies may have outweighed the effects of HAP on  
414 birthweight outcomes.

## 415 416 **Conclusions**

417  
418 In this study population drawn from diverse socio-demographic settings across four  
419 countries, exposure to HAP – particularly to BC and to a lesser extent to  $PM_{2.5}$  during  
420 pregnancy was associated with reduced birthweight and weight-for-gestational age z-  
421 scores. To our knowledge, ours is the first study reporting on E-R relationships between  
422 gestational BC exposures from HAP and birthweight. The association, while modest,  
423 provides strong support for continuing efforts to address HAP exposures alongside other  
424 drivers of impaired fetal growth in LMICs.

425  
426  
427  
428

429 **Data Sharing**

|                                                                              |                                                                                                                                                                           |
|------------------------------------------------------------------------------|---------------------------------------------------------------------------------------------------------------------------------------------------------------------------|
| Will individual participant data be available (including data dictionaries)? | Yes                                                                                                                                                                       |
| What data in particular will be shared?                                      | Individual participant data that underlie the results reported in this article, after de-identification (all results summarized in text, tables, figures, and appendices) |
| What other documents will be available?                                      | Study protocol, statistical analysis plan, informed consent form, analytic code                                                                                           |
| When will data be available (start and end dates)?                           | Beginning 6 months following article publication                                                                                                                          |
| With whom?                                                                   | Anyone who wishes to access the data                                                                                                                                      |
| For what types of analyses?                                                  | Any purpose                                                                                                                                                               |
| By what mechanism will data be made available?                               | Data are available indefinitely at DataVerse (link to be included)                                                                                                        |

430

431 **Acknowledgments**

432

433 The HAPIN trial is funded by the U.S. National Institutes of Health (cooperative  
434 agreement 1UM1HL134590) in collaboration with the Bill & Melinda Gates Foundation  
435 (OPP1131279). The investigators would like to thank the members of the advisory  
436 committee - Patrick Brysse, Donna Spiegelman, and Joel Kaufman - for their valuable insight  
437 and guidance throughout the implementation of the trial. We also wish to acknowledge all  
438 research staff and study participants for their dedication to and participation in this  
439 important trial.

440

441 A multidisciplinary, independent Data and Safety Monitoring Board (DSMB) appointed by  
442 the National Heart, Lung, and Blood Institute (NHLBI) monitors the quality of the data and  
443 protects the safety of patients enrolled in the HAPIN trial. NHLBI DSMB: Nancy R Cook,  
444 Stephen Hecht, Catherine Karr (Chair), Joseph Millum, Nalini Sathiakumar, Paul K Whelton,  
445 Gail Weinmann and Thomas Croxton (Executive Secretaries). Program Coordination: Gail  
446 Rodgers, Bill & Melinda Gates Foundation; Claudia L Thompson, National Institute of  
447 Environmental Health Science; Mark J. Parascandola, National Cancer Institute; Marion  
448 Koso-Thomas, Eunice Kennedy Shriver National Institute of Child Health and Human  
449 Development; Joshua P Rosenthal, Fogarty International Center; Conception R Nierras, NIH  
450 Office of Strategic Coordination Common Fund; Katherine Kavounis, Dong- Yun Kim,  
451 Antonello Punturieri, and Barry S Schmetter, NHLBI. The findings and conclusions in this  
452 report are those of the authors and do not necessarily represent the official position of the  
453 US National Institutes of Health or Department of Health and Human Services.

454

455

456

457 **References**

458

- 459 1 Bennitt FB, Wozniak SS, Causey K, Burkart K, Brauer M. Estimating disease burden  
460 attributable to household air pollution: new methods within the Global Burden of Disease  
461 Study. *The Lancet Global Health* 2021; **9**: S18.
- 462 2 Smith KR, Bruce N, Balakrishnan K, *et al.* Millions Dead: How Do We Know and What Does  
463 It Mean? Methods Used in the Comparative Risk Assessment of Household Air Pollution.  
464 *Annual Review of Public Health* 2014; **35**: 185–206.
- 465 3 Amegah AK, Quansah R, Jaakkola JJK. Household Air Pollution from Solid Fuel Use and  
466 Risk of Adverse Pregnancy Outcomes: A Systematic Review and Meta-Analysis of the  
467 Empirical Evidence. *PLoS one* 2014; **9**: e113920.
- 468 4 Ghosh R, Causey K, Burkart K, Wozniak S, Cohen A, Brauer M. Ambient and household  
469 PM2.5 pollution and adverse perinatal outcomes: A meta-regression and analysis of  
470 attributable global burden for 204 countries and territories. *PLOS Medicine* 2021; **18**:  
471 e1003718.
- 472 5 Pope DP, Mishra V, Thompson L, *et al.* Risk of Low Birth Weight and Stillbirth Associated  
473 With Indoor Air Pollution From Solid Fuel Use in Developing Countries. *Epidemiol Rev*  
474 2010; **32**: 70–81.
- 475 6 Younger A, Alkon A, Harknett K, Jean Louis R, Thompson LM. Adverse birth outcomes  
476 associated with household air pollution from unclean cooking fuels in low- and middle-  
477 income countries: A systematic review. *Environmental Research* 2022; **204**: 112274.
- 478 7 Blencowe H, Krusevec J, de Onis M, *et al.* National, regional, and worldwide estimates of  
479 low birthweight in 2015, with trends from 2000: a systematic analysis. *Lancet Glob*  
480 *Health* 2019; **7**: e849–60.
- 481 8 Accrombessi M, Zeitlin J, Massougbdji A, Cot M, Briand V. What Do We Know about Risk  
482 Factors for Fetal Growth Restriction in Africa at the Time of Sustainable Development  
483 Goals? A Scoping Review. *Paediatr Perinat Epidemiol* 2018; **32**: 184–96.
- 484 9 Stoner O, Lewis J, Martínez IL, Gumy S, Economou T, Adair-Rohani H. Household cooking  
485 fuel estimates at global and country level for 1990 to 2030. *Nature Communications*  
486 2021; **12**: 5793.
- 487 10 Balakrishnan K, Ghosh S, Thangavel G, *et al.* Exposures to fine particulate matter (PM2.5)  
488 and birthweight in a rural-urban, mother-child cohort in Tamil Nadu, India. *Environmental*  
489 *Research* 2018; **161**: 524–31.
- 490 11 Wylie BJ, Kishashu Y, Matechi E, *et al.* Maternal exposure to carbon monoxide and fine  
491 particulate matter during pregnancy in an urban Tanzanian cohort. *Indoor Air* 2017; **27**:  
492 136–46.
- 493 12 Alexander DA, Northcross A, Karrison T, *et al.* Pregnancy outcomes and ethanol cook  
494 stove intervention: A randomized-controlled trial in Ibadan, Nigeria. *Environment*  
495 *International* 2018; **111**: 152–63.

- 496 13Quinn AK, Adjei IA, Ae-Ngibise KA, *et al.* Prenatal household air pollutant exposure is  
497 associated with reduced size and gestational age at birth among a cohort of Ghanaian  
498 infants. *Environ Int* 2021; **155**: 106659.
- 499 14Thompson LM, Bruce N, Eskenazi B, Diaz A, Pope D, Smith KR. Impact of Reduced  
500 Maternal Exposures to Wood Smoke from an Introduced Chimney Stove on Newborn  
501 Birth Weight in Rural Guatemala. *Environmental Health Perspectives* 2011; **119**: 1489–94.
- 502 15Katz J, Tielsch JM, Khattry SK, *et al.* Impact of Improved Biomass and Liquid Petroleum Gas  
503 Stoves on Birth Outcomes in Rural Nepal: Results of 2 Randomized Trials. *Glob Health Sci*  
504 *Pract* 2020; **8**: 372–82.
- 505 16Jack DW, Ae-Ngibise KA, Gould CF, *et al.* A cluster randomised trial of cookstove  
506 interventions to improve infant health in Ghana. *BMJ Glob Health* 2021; **6**: e005599.
- 507 17Barr DB, Puttaswamy N, Jaacks LM, *et al.* Design and Rationale of the Biomarker Center of  
508 the Household Air Pollution Intervention Network (HAPIN) Trial. *Environ Health Perspect*  
509 2020; **128**: 047010.
- 510 18Clasen T, Checkley W, Peel JL, *et al.* Design and Rationale of the HAPIN Study: A  
511 Multicountry Randomized Controlled Trial to Assess the Effect of Liquefied Petroleum Gas  
512 Stove and Continuous Fuel Distribution. *Environ Health Perspect* 2020; **128**: 047008.
- 513 19Johnson MA, Steenland K, Piedrahita R, *et al.* Air Pollutant Exposure and Stove Use  
514 Assessment Methods for the Household Air Pollution Intervention Network (HAPIN) Trial.  
515 *Environ Health Perspect* 2020; **128**: 047009.
- 516 20Liao J, Kirby MA, Pillarisetti A, *et al.* LPG stove and fuel intervention among pregnant  
517 women reduce fine particle air pollution exposures in three countries: Pilot results from  
518 the HAPIN trial. *Environmental Pollution* 2021; **291**: 118198.
- 519 21Sambandam S, Mukhopadhyay K, Sendhil S, *et al.* Exposure contrasts associated with a  
520 liquefied petroleum gas (LPG) intervention at potential field sites for the multi-country  
521 household air pollution intervention network (HAPIN) trial in India: results from pilot  
522 phase activities in rural Tamil Nadu. *BMC Public Health* 2020; **20**: 1799.
- 523 22Johnson M, Pillarisetti A, Piedrahita R, *et al.* Exposure contrasts of pregnant women  
524 during the Household Air Pollution Intervention Network randomized controlled trial.  
525 *Occupational and Environmental Health*, 2021 DOI:10.1101/2021.11.04.21265938.
- 526 23Burrowes VJ, Piedrahita R, Pillarisetti A, *et al.* Comparison of next-generation portable  
527 pollution monitors to measure exposure to PM<sub>2.5</sub> from household air pollution in Puno,  
528 Peru. *Indoor Air* 2020; **30**: 445–58.
- 529 24Chillrud SN, Ae-Ngibise KA, Gould CF, *et al.* The effect of clean cooking interventions on  
530 mother and child personal exposure to air pollution: results from the Ghana Randomized  
531 Air Pollution and Health Study (GRAPHHS). *J Expo Sci Environ Epidemiol* 2021; **31**: 683–98.

- 532 25 Wilcox RR. Introduction to Robust Estimation and Hypothesis Testing. Academic Press,  
533 2011.
- 534 26 Tielsch JM, Katz J, Thulasiraj RD, *et al.* Exposure to indoor biomass fuel and tobacco  
535 smoke and risk of adverse reproductive outcomes, mortality, respiratory morbidity and  
536 growth among newborn infants in south India. *International Journal of Epidemiology*  
537 2009; **38**: 1351–63.
- 538 27 Greenland S. Modeling and variable selection in epidemiologic analysis. *Am J Public*  
539 *Health* 1989; **79**: 340–9.
- 540 28 Harre FE Jr, Lee KL, Pollock BG. Regression Models in Clinical Studies: Determining  
541 Relationships Between Predictors and Response2. *JNCI: Journal of the National Cancer*  
542 *Institute* 1988; **80**: 1198–202.
- 543 29 Wylie BJ, Matechi E, Kishashu Y, *et al.* Placental Pathology Associated with Household Air  
544 Pollution in a Cohort of Pregnant Women from Dar es Salaam, Tanzania. *Environmental*  
545 *health perspectives* 2017; **125**: 134–40.
- 546 30 Carter E, Norris C, Dionisio KL, *et al.* Assessing Exposure to Household Air Pollution: A  
547 Systematic Review and Pooled Analysis of Carbon Monoxide as a Surrogate Measure of  
548 Particulate Matter. *Environmental health perspectives* 2017; **125**: 076002.
- 549 31 Steenland K, Pillarisetti A, Kirby M, *et al.* Modeling the potential health benefits of lower  
550 household air pollution after a hypothetical liquified petroleum gas (LPG) cookstove  
551 intervention. *Environment International* 2018; **111**: 71–9.
- 552

1 **Table 1.** Summary of number of observations used in the exposure-response analysis

| <b>Research center</b> | <b>Pregnant women enrolled</b> | <b>Valid birthweights<sup>1</sup></b> | <b>Valid PM<sub>2.5</sub> exposure measures</b> | <b>Valid BC exposure measures</b> | <b>Valid CO exposure measures</b> |
|------------------------|--------------------------------|---------------------------------------|-------------------------------------------------|-----------------------------------|-----------------------------------|
| Guatemala              | 800                            | 750                                   | 703                                             | 677                               | 727                               |
| India                  | 799                            | 773                                   | 710                                             | 698                               | 735                               |
| Peru                   | 798                            | 730                                   | 609                                             | 567                               | 600                               |
| Rwanda                 | 798                            | 749                                   | 695                                             | 618                               | 710                               |
| <b>Total N (%)</b>     | 3195*                          | 3002                                  | 2717 (91%)                                      | 2560 (85%)                        | 2772 (92%)                        |

2 <sup>1</sup> Women with valid birthweights, excluding children whose birth with gestational age greater than 300 days (z-scores unavailable from INTERGROWTH)

3  
4  
5  
6  
7

8 **Table 2.** Trial-wide and country-specific maternal characteristics

| <b>Maternal characteristics<sup>1</sup></b>        | <b>Guatemala</b> | <b>India</b> | <b>Peru</b>  | <b>Rwanda</b> | <b>Total</b>  |
|----------------------------------------------------|------------------|--------------|--------------|---------------|---------------|
|                                                    | <b>N=750</b>     | <b>N=773</b> | <b>N=730</b> | <b>N=749</b>  | <b>N=3002</b> |
| Age (years), N (%)                                 |                  |              |              |               |               |
| <20                                                | 115 (15)         | 122 (15)     | 93 (12)      | 46 (6)        | 376 (12)      |
| 20 – 24                                            | 303 (40)         | 373 (48)     | 261 (35)     | 187 (25)      | 1124 (37)     |
| 25-29                                              | 221 (29)         | 223 (28)     | 232 (31)     | 280 (37)      | 956 (31)      |
| 30-35                                              | 111 (15)         | 55 (7)       | 144 (19)     | 236 (31)      | 546 (18)      |
| Gestational age at recruitment (weeks), mean (SD)  | 14.3 (3)         | 16 (3)       | 15.7 (3.3)   | 15.4 (2.8)    | 15.3 (3.1)    |
| Nulliparous, N (%)                                 |                  |              |              |               |               |
| Yes                                                | 213 (28)         | 442 (57)     | 278 (38)     | 218 (29)      | 1151 (38)     |
| No                                                 | 537 (71)         | 337 (42)     | 448 (61)     | 529 (70)      | 1845 (61)     |
| Highest level of education completed, N (%)        |                  |              |              |               |               |
| No formal education / some primary school          | 358 (47)         | 275 (35)     | 32 (4)       | 316 (42)      | 981 (32)      |
| Primary school / some secondary school             | 298 (38)         | 219 (28)     | 224 (30)     | 299 (40)      | 1034 (35)     |
| Secondary / Vocational /Some University            | 100 (13)         | 279 (36)     | 474 (65)     | 134 (18)      | 987 (33)      |
| Height (cm), mean (SD)                             | 148 (5.3)        | 151 (5.6)    | 152 (4.5)    | 156 (5.8)     | 152 (6.2)     |
| Body mass index (kg/m <sup>2</sup> ) mean (SD)     | 23.7 (3.3)       | 19.7 (3.1)   | 26 (3.5)     | 23.4 (3.4)    | 23.2 (4.1)    |
| Hemoglobin (gm/dl), mean (SD)                      | 12.7 (1.04)      | 10.3 (1.2)   | 14 (1.2)     | 12.4 (1.5)    | 12.4 (1.9)    |
| Minimum dietary diversity, Category (score) N (%)  |                  |              |              |               |               |
| Low (<4)                                           | 514 (68)         | 600 (77)     | 73 (10)      | 505 (67)      | 1692 (56)     |
| Medium (4-5)                                       | 206 (27)         | 149 (20)     | 403 (55)     | 208 (27)      | 966 (32)      |
| High (>5)                                          | 30 (4)           | 24 (3)       | 254 (34)     | 35 (4)        | 343 (11)      |
| Household food insecurity, Category (score), N (%) |                  |              |              |               |               |
| Food secure                                        | 415 (56)         | 628 (81)     | 378 (52)     | 276 (37)      | 1697 (57)     |
| Mild (1, 2, 3)                                     | 238 (32)         | 108 (14)     | 251 (34)     | 212 (29)      | 809 (27)      |
| Moderate (4, 5, 6) / Severe (7, 8)                 | 88 (11)          | 33 (4)       | 91 (12)      | 243 (33)      | 455 (15)      |

|                                               |           |           |           |           |           |
|-----------------------------------------------|-----------|-----------|-----------|-----------|-----------|
| Number of people sleeping in house, mean (SD) | 5.1 (2.6) | 3.7 (1.5) | 4.5 (1.7) | 3.4 (1.4) | 4.3 (2)   |
| Someone in the household smokes, N (%)        |           |           |           |           |           |
| Yes                                           | 39 (5)    | 244 (31)  | 7 (1)     | 28 (4)    | 318 (11)  |
| No                                            | 711 (94)  | 529 (68)  | 722 (99)  | 719 (96)  | 2681 (89) |
| Owns household assets, N (%)                  |           |           |           |           |           |
| Color Television                              | 344 (45)  | 577 (74)  | 470 (64)  | 98 (13)   | 1489 (49) |
| Radio                                         | 283 (37)  | 105 (13)  | 540 (73)  | 420 (56)  | 1348 (45) |
| Mobile phone                                  | 687 (91)  | 635 (82)  | 699 (95)  | 594 (79)  | 2815 (87) |
| Bicycle                                       | 94 (12)   | 120 (15)  | 278 (38)  | 229 (30)  | 721 (24)  |
| Bank account                                  | 186 (24)  | 695 (89)  | 172 (23)  | 221 (29)  | 1274 (42) |

9 <sup>1</sup> Descriptive statistics summary based on 3002 pregnant women included in the final analyses, which includes women with live births, valid birthweights,  
10 and gestational age at birth < 300 days



11 **Table 3.** Change in birthweight for an IQR increase in PM<sub>2.5</sub>, BC, and CO<sup>1</sup>

| Pollutant         | Model Type | Estimate (95% CI)   | p-value | AIC   |
|-------------------|------------|---------------------|---------|-------|
| PM <sub>2.5</sub> | Linear     | -14.8 (-28.7, -0.8) | 0.04    | 40211 |
|                   | Log linear | -11.2 (-33.6, 11.2) | 0.33    | 40215 |
| BC                | Linear     | -21.9 (-37.7, -6.1) | 0.01    | 37876 |
|                   | Log linear | -19.2 (-40.1, 1.7)  | 0.07    | 37880 |
| CO                | Linear     | -3.1 (-12.1, 5.8)   | 0.50    | 41017 |
|                   | Log Linear | 10.6 (-7.2, 28.4)   | 0.24    | 41017 |

12 <sup>1</sup> All models adjusted for mother's education, baseline BMI, nulliparity, diet diversity, food insecurity  
13 score, second-hand smoke, baseline hemoglobin, age, infant sex, and 10 randomization strata. IQRs  
14 for PM<sub>2.5</sub>, BC, and CO were 74.51, 7.30, and 1.68 respectively. On the log scale, IQRs for PM<sub>2.5</sub>, BC,  
15 and CO were 1.04, 0.85, and 1.40 respectively.

16  
17

18 **Table 4.** Change in weight-for-gestational age z-scores with an IQR increase in PM<sub>2.5</sub>, BC, and CO<sup>1</sup>

| Pollutant         | Model      | Estimate (95% CI)      | p-value | AIC  |
|-------------------|------------|------------------------|---------|------|
| PM <sub>2.5</sub> | Linear     | -0.03 (-0.06, 0.00)    | 0.04    | 7021 |
|                   | Log linear | -0.04 (0.09, 0.01)     | 0.10    | 7023 |
| BC                | linear     | -0.05 (-0.08, -0.01)   | 0.01    | 6591 |
|                   | Log linear | -0.06 (-0.10, -0.01)   | 0.02    | 6593 |
| CO                | linear     | -0.003 (-0.023, 0.017) | 0.78    | 7215 |
|                   | Log linear | 0.02 (-0.02, 0.06)     | 0.24    | 7214 |

19 <sup>1</sup> All models adjusted for mother's education, baseline BMI, nulliparity, diet diversity, food insecurity  
20 score, second-hand smoke, baseline hemoglobin, age, infant sex and 10 randomization strata. IQRs  
21 for PM<sub>2.5</sub>, BC, and CO were 74.51, 7.30, and 1.68 respectively. On the log scale, IQRs for PM<sub>2.5</sub>, BC,  
22 and CO were 1.04, 0.85, and 1.40 respectively.

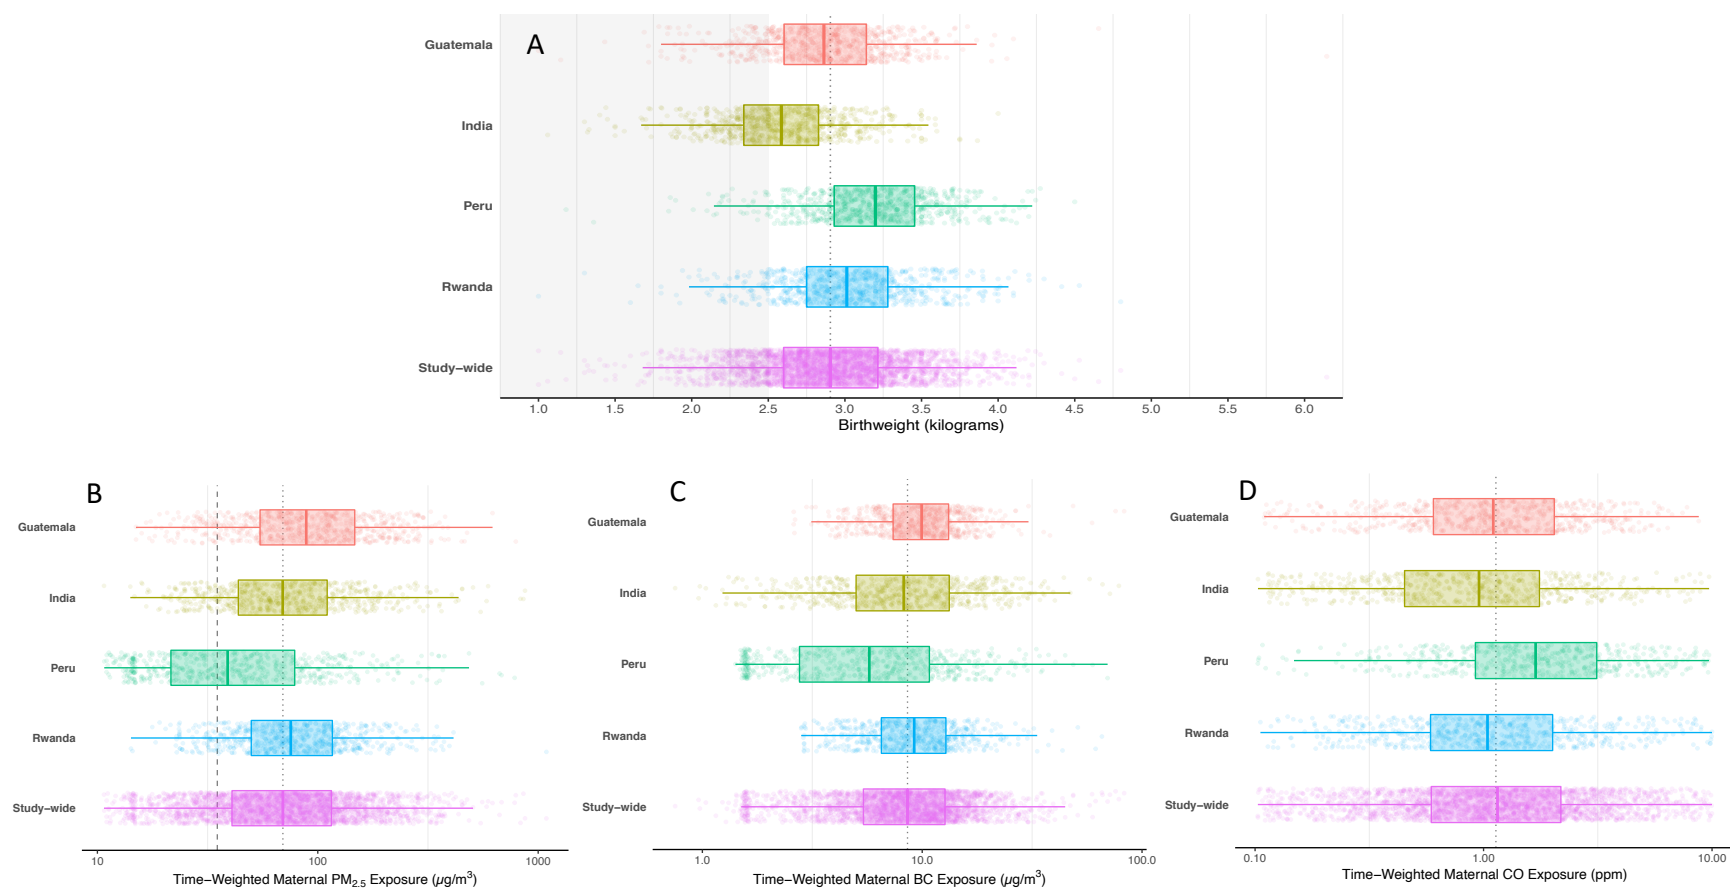

**Figure 1.** Distribution of (A) birthweight and time-weighted (B)  $\text{PM}_{2.5}$ , (C) BC, and (D) CO. Corresponding numeric data are in Supplemental Table 6. Results are presented separately for each study site and in combination for the entire trial. Dots are individual datapoints. X-axes are log transformed. Thick solid lines inside the box are medians. The lower and upper hinges (i.e., the ends of the box) correspond to the 25<sup>th</sup> and 75<sup>th</sup> percentiles. The whiskers (i.e., the lines beyond the box) extend from the hinge to  $1.5 \times \text{IQR}$ . The panel-wide dotted vertical lines are study-wide medians. In panel (A), the shaded area indicates low birthweight (<math>< 2500\text{ g}</math>). In Panel (B), the dashed line is the WHO Interim Target 1 annual guideline value of  $35\ \mu\text{g}/\text{m}^3$ .

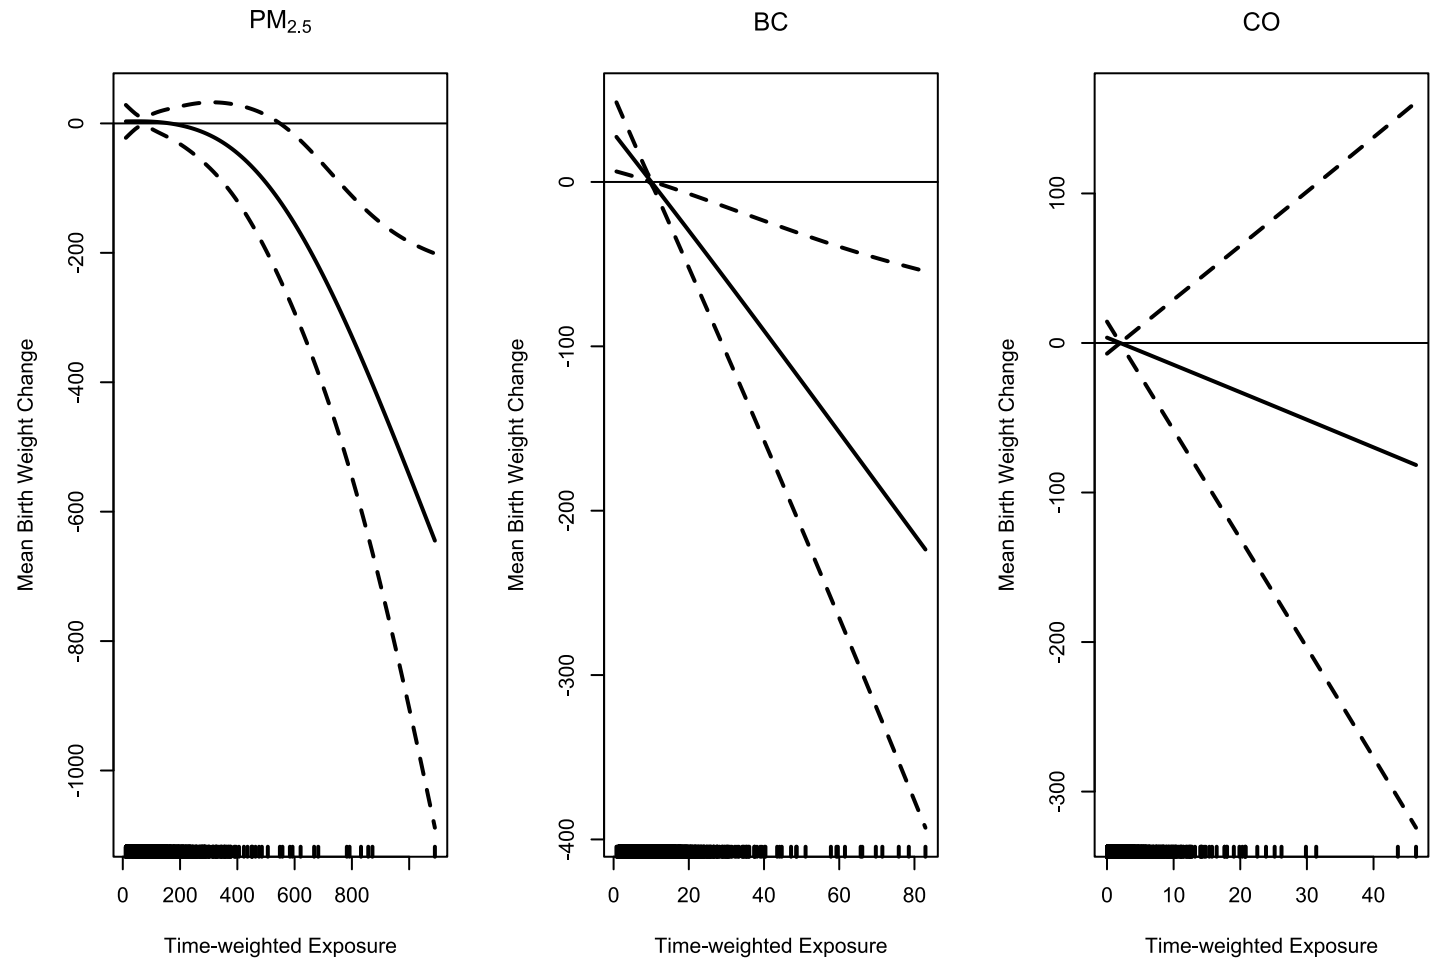

**Figure 2.** Exposure-response relationships between birthweight and prenatal PM<sub>2.5</sub>, BC, and CO personal exposures. Vertical dashes along the x-axis are observed measurements.

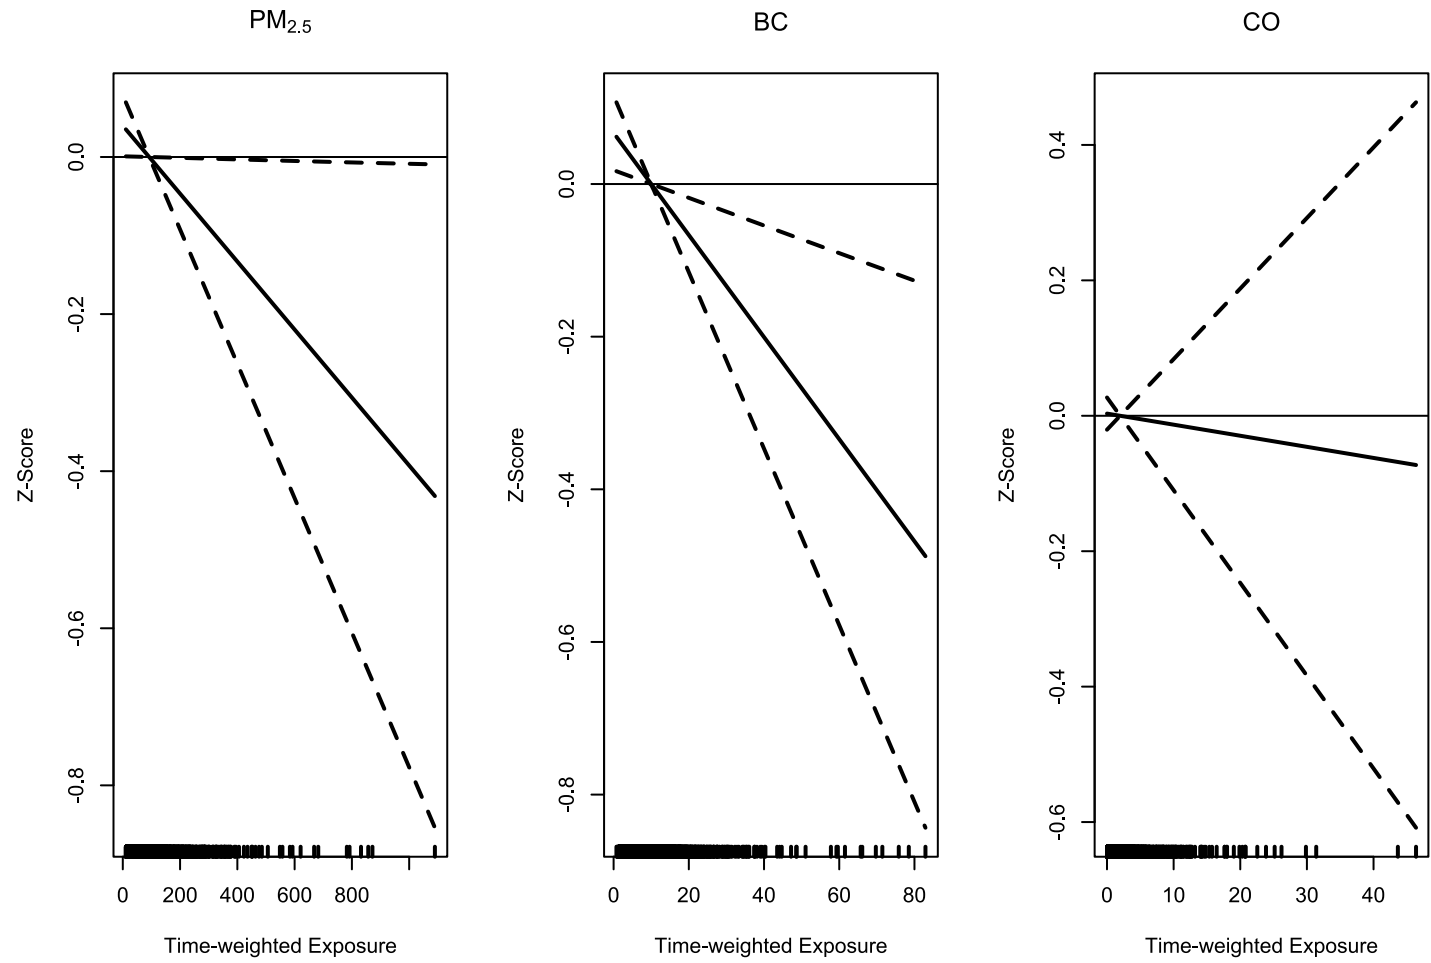

**Figure 3.** Exposure-response relationships between weight-for-gestational age z-scores and prenatal PM<sub>2.5</sub>, BC, and CO personal exposures. Vertical dashes along the x-axis are observed measurements.
